# Supplementary material for: Investigating the Central Nervous System Disposition of Actinomycin D: Implementation and Evaluation of Cerebral Microdialysis and Brain Tissue Measurements Supported by UPLC-MS/MS Quantification
Source: MDPI journal article supplement (doi:10.3390/pharmaceutics13091498), 2021-09-17
Supplement: s1 [file s1]

# Supplementary Materials: Investigating the Central Nervous System Disposition of Actinomycin D: Implementation and Evaluation of Cerebral Microdialysis and Brain Tissue Measurements Supported by UPLC-MS/MS Quantification

Julia Benzel, Gzona Bajraktari-Sylejmani, Philipp Uhl, Abigail Davis, Sreenath Nair, Stefan M. Pfister, Walter E. Haefeli, Johanna Weiss, Jürgen Burhenne, Kristian W. Pajtler and Max Sauter

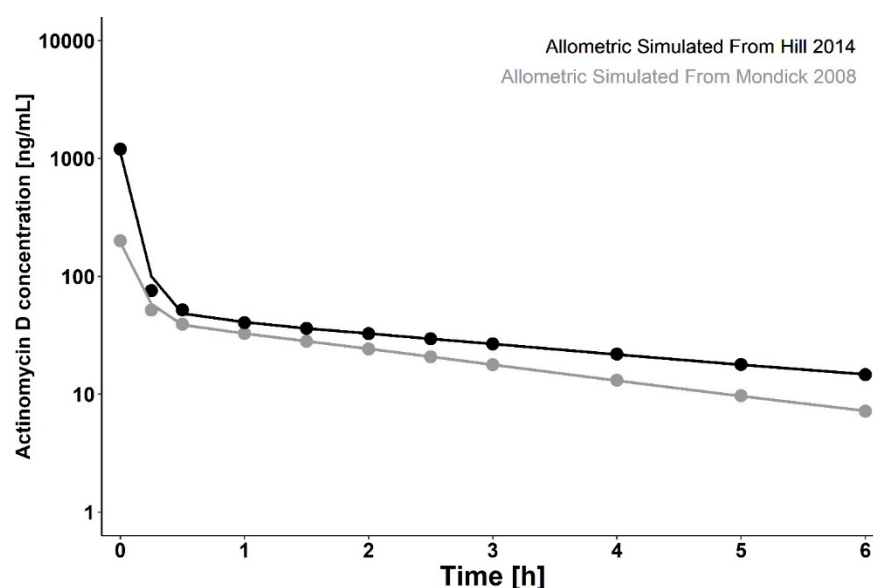

**Figure S1.** Allometric simulation of actinomycin D's pharmacokinetic profile in mice according to published data in humans [1,2] by allometrically scaling the clearance and volumes parameters using classic exponents (0.75 for clearances and 1 for volumes) from mouse to human [3].

**Table S1.** Recovery data.

|              |                  | Low QC      | Medium QC  | High QC    | IS         |
|--------------|------------------|-------------|------------|------------|------------|
|              |                  | 0.150 ng/mL | 3.00 ng/mL | 60.0 ng/mL | 1.50 ng/mL |
| Plasma       | Recovery [%]     | 94.1        | 91.0       | 95.0       | 99.7       |
|              | Precision [% CV] | 6.43        | 0.35       | 1.61       | 3.58       |
| Brain tissue | Recovery [%]     | 103.9       | 104.0      | 96.6       | 111.4      |
|              | Precision [% CV] | 2.92        | 9.10       | 8.74       | 2.07       |

CV: Coefficient of variation. N = 3 replicates at each QC concentration.

**Table S2.** Calibration curves of validation batches calculated with linear regression and  $1/x^2$  weighting.

| Batch                     | Formula of calibration curve | Coefficient of regression ( $r^2$ ) |
|---------------------------|------------------------------|-------------------------------------|
| Validation plasma 1       | $0.0580 x + 0.0014$          | 0.9964                              |
| Validation plasma 2       | $0.0227 x + 0.0015$          | 0.9920                              |
| Validation plasma 3       | $0.0338 x + 0.0008$          | 0.9973                              |
| Validation brain tissue 1 | $0.6332 x + 0.0002$          | 0.9916                              |
| Validation brain tissue 2 | $0.4975 x - 0.0034$          | 0.9904                              |
| Validation brain tissue 3 | $0.4092 x - 0.0091$          | 0.9926                              |

**Table S3.** Summary of quality control results for plasma actinomycin D.

|                |                  | Nominal actinomycin D concentrations [ng/mL] |        |        |         |
|----------------|------------------|----------------------------------------------|--------|--------|---------|
|                |                  | LLOQ                                         | Low QC | Mid QC | High QC |
|                |                  | 0.050                                        | 0.150  | 3.00   | 60.0    |
| Within-batch   |                  |                                              |        |        |         |
| 1              | Mean [ng/mL]     | 0.047                                        | 0.141  | 3.10   | 60.2    |
|                | Accuracy [%]     | 94.0                                         | 93.4   | 103.2  | 100.3   |
|                | Precision [% CV] | 13.2                                         | 4.95   | 4.94   | 3.49    |
| 2              | Mean [ng/mL]     | 0.045                                        | 0.154  | 3.23   | 63.5    |
|                | Accuracy [%]     | 90.0                                         | 102.8  | 107.7  | 105.8   |
|                | Precision [% CV] | 1.57                                         | 6.98   | 5.68   | 3.19    |
| 3              | Mean [ng/mL]     | 0.050                                        | 0.162  | 3.14   | 60.4    |
|                | Accuracy [%]     | 99.0                                         | 108.0  | 104.7  | 100.7   |
|                | Precision [% CV] | 8.74                                         | 5.79   | 8.12   | 6.71    |
| Batch-to-batch |                  |                                              |        |        |         |
|                | Mean [ng/mL]     | 0.048                                        | 0.152  | 3.16   | 61.3    |
|                | Accuracy [%]     | 95.9                                         | 101.6  | 105.2  | 102.2   |
|                | Precision [% CV] | 8.10                                         | 8.17   | 6.27   | 5.10    |

N = 5 replicates at each LLOQ and QC level. CV: coefficient of variation; LLOQ: lower limit of quantification; QC: quality control homogenate.

**Table S4.** Summary of quality control results for actinomycin D in brain tissue homogenate.

|                |                  | Nominal actinomycin D concentrations [ng/mL] |        |        |         |
|----------------|------------------|----------------------------------------------|--------|--------|---------|
|                |                  | LLOQ                                         | Low QC | Mid QC | High QC |
|                |                  | 0.050                                        | 0.150  | 3.00   | 60.0    |
| Within-batch   |                  |                                              |        |        |         |
| 1              | Mean [ng/mL]     | 0.053                                        | 0.169  | 3.35   | 57.8    |
|                | Accuracy [%]     | 106.3                                        | 112.7  | 111.6  | 96.3    |
|                | Precision [%CV]  | 4.82                                         | 1.18   | 4.10   | 5.30    |
| 2              | Mean [ng/mL]     | 0.051                                        | 0.164  | 3.28   | 56.8    |
|                | Accuracy [%]     | 101.7                                        | 109.2  | 109.4  | 94.7    |
|                | Precision [%CV]  | 6.97                                         | 3.42   | 2.27   | 2.80    |
| 3              | Mean [ng/mL]     | 0.052                                        | 0.158  | 3.03   | 53.7    |
|                | Accuracy [%]     | 104.0                                        | 105.6  | 100.9  | 89.6    |
|                | Precision [%CV]  | 12.7                                         | 2.66   | 6.68   | 4.03    |
| Batch-to-batch |                  |                                              |        |        |         |
|                | Mean [ng/mL]     | 0.050                                        | 0.164  | 3.23   | 56.4    |
|                | Accuracy [%]     | 99.6                                         | 109.4  | 107.7  | 94.0    |
|                | Precision [% CV] | 9.81                                         | 3.59   | 5.96   | 4.90    |

N = 5 replicates at each LLOQ and QC level. CV: coefficient of variation; LLOQ: lower limit of quantification; QC: quality control.

**Table S5.** Summary of quality control results for actinomycin D in micro-dialysate.

|                  |  | Nominal actinomycin D concentrations [ng/mL] |        |        |         |
|------------------|--|----------------------------------------------|--------|--------|---------|
|                  |  | LLOQ                                         | Low QC | Mid QC | High QC |
|                  |  | 0.050                                        | 0.150  | 3.00   | 60.0    |
| Mean [ng/mL]     |  | 0.048                                        | 0.162  | 2.78   | 52.5    |
| Accuracy [%]     |  | 96.0                                         | 108.1  | 92.7   | 87.5    |
| Precision [% CV] |  | 11.7                                         | 3.34   | 6.12   | 3.41    |

N = 5 replicates at each LLOQ and QC level. CV: coefficient of variation; LLOQ: lower limit of quantification; QC: quality control.

**Table S6.** Summary of quality control results for actinomycin D in cell homogenate.

|                  | Nominal actinomycin D concentrations [ng/mL] |                 |                |                 |
|------------------|----------------------------------------------|-----------------|----------------|-----------------|
|                  | LLOQ<br>0.050                                | Low QC<br>0.150 | Mid QC<br>3.00 | High QC<br>60.0 |
| Mean [ng/mL]     | 0.050                                        | 0.156           | 3.20           | 66.4            |
| Accuracy [%]     | 100.3                                        | 103.9           | 106.7          | 110.6           |
| Precision [% CV] | 12.2                                         | 6.21            | 7.51           | 3.75            |

N = 5 replicates at each LLOQ and QC level. CV: coefficient of variation; LLOQ: lower limit of quantification; QC: quality control.

**Table S7.** Stability data of the plasma validation.

|                                      | Low QC<br>0.150 ng/mL | Medium QC<br>3.00 ng/mL | High QC<br>60.0 ng/mL |
|--------------------------------------|-----------------------|-------------------------|-----------------------|
| Freeze-and-thaw stability            |                       |                         |                       |
| Accuracy [%]                         | 93.6                  | 92.0                    | 87.6                  |
| Precision [% CV]                     | 5.80                  | 7.59                    | 2.65                  |
| 1-month plasma stability at -25 °C   |                       |                         |                       |
| Accuracy [%]                         | 95.6                  | 98.3                    | 100.7                 |
| Precision [% CV]                     | 14.7                  | 2.44                    | 2.00                  |
| 2 days buffer stability at RT        |                       |                         |                       |
| Accuracy [%]                         | 108.7                 | 113.5                   | 104.7                 |
| Precision [% CV]                     | 5.21                  | 1.69                    | 8.49                  |
| 6-month stability in solution at 4°C |                       |                         |                       |
| Accuracy [%]                         | 88.3                  | 86.4                    | 87.2                  |
| Precision [% CV]                     | 1.60                  | 5.54                    | 3.34                  |

CV: Coefficient of variation. N = 3 replicates at each QC concentration. RT: room temperature.

**Table S8.** Results of the incurred sample reanalysis.

| Mouse # | Time of sampling [h] | Actinomycin D concentration [ng/mL]<br>Original analysis | Actinomycin D concentration [ng/mL]<br>Incurred reanalysis | Deviation from mean [%] |
|---------|----------------------|----------------------------------------------------------|------------------------------------------------------------|-------------------------|
| 5       | 22                   | 1.40                                                     | 1.19                                                       | 16.2                    |
| 6       | 6                    | 1.31                                                     | 1.17                                                       | 11.3                    |
| 6       | 22                   | 1.36                                                     | 1.16                                                       | 15.9                    |
| 7       | 6                    | 5.51                                                     | 5.23                                                       | 5.21                    |
| 7       | 22                   | 4.48                                                     | 5.17                                                       | 14.3                    |

**Table S9.** Summary of quality control results for actinomycin D quantification of minimally diluted QC samples with calibration samples spiked with regular solutions.

|                  | Nominal actinomycin D concentrations [ng/mL] |                |                 |
|------------------|----------------------------------------------|----------------|-----------------|
|                  | Low QC<br>0.150                              | Mid QC<br>3.00 | High QC<br>60.0 |
| Mean [ng/mL]     | 0.142                                        | 2.80           | 53.8            |
| Accuracy [%]     | 94.7                                         | 93.5           | 89.8            |
| Precision [% CV] | 10.0                                         | 9.03           | 1.43            |

N = 3 replicates at each LLOQ and QC level. CV: coefficient of variation; QC: quality control.

**Table S10.** Matrix effect data.

|              |                                 | Low QC      | Medium QC  | High QC    | IS         |
|--------------|---------------------------------|-------------|------------|------------|------------|
|              |                                 | 0.150 ng/mL | 3.00 ng/mL | 60.0 ng/mL | 1.50 ng/mL |
| Plasma       | Matrix effect [%]               | 66.2        | 74.2       | 73.1       | 66.2       |
|              | Matrix effect IS-normalized [%] | 104.6       | 109.8      | 102.0      |            |
|              | Precision [% CV]                | 13.7        | 1.05       | 6.91       | 1.08       |
| Brain tissue | Matrix effect [%]               | 56.0        | 63.2       | 62.3       | 52.0       |
|              | Matrix effect IS-normalized [%] | 110.3       | 114.5      | 112.8      |            |
|              | Precision [% CV]                | 8.04        | 2.75       | 4.89       | 2.46       |

CV: Coefficient of variation. N = 3 replicates at each QC concentration.

**Table S11.** *In vitro* probe performance comparison.

| Probe                | CAM7<br>(Cat.No.:8012411)<br>n = 2 | CMA8<br>(Cat.No.:8012201)<br>n = 1 | MD-2211<br>n = 5 |
|----------------------|------------------------------------|------------------------------------|------------------|
| Material             | Polyethersulfone (PES)             | Polyacrylethersulfone (PAES)       | Cellulose        |
| MWCO                 | 55kDa                              | 20kDa                              | 35kDa            |
| RD recovery rate (%) | 81.6 ± 9.9                         | 88.83                              | 79.4 ± 2.8       |

RD: Retrodialysis.

**Table S12.** Actinomycin D in vitro retrodialysis results.

|                   | Probe 1 | Probe 2 | Probe 3 | Probe 4 | Mean       |
|-------------------|---------|---------|---------|---------|------------|
| 1 h (ng/mL)       | 11.2    | 20.0    | 3.82    | 5.37    |            |
| 2 h (ng/mL)       | 9.78    | 13.6    | 7.54    | 16.9    |            |
| 3 h (ng/mL)       | 16.4    | 17.0    | 9.84    | 13.3    |            |
| Stock (ng/mL)†    | 95.6    | 73.6    | 67.5    | 76.6    |            |
| Recovery rate (%) | 87.0    | 77.1    | 89.5    | 84.5    | 84.5 ± 5.4 |

† Expected concentration of 100 ng/mL.

**Table S13.** Actinomycin C in vitro retrodialysis results using 1 % BSA.

|                   | Probe 1 | Probe 2 | Mean       |
|-------------------|---------|---------|------------|
| 1 h (ng/mL)       | 6.27    | 4.14    |            |
| 2 h (ng/mL)       | 6.38    | 9.59    |            |
| 3 h (ng/mL)       | 11.8    | 13.6    |            |
| Stock (ng/mL)†    | 67.4    | 71.08   |            |
| Recovery rate (%) | 87.9    | 87.2    | 87.6 ± 0.5 |

† Expected concentration of 100 ng/mL.

**Table S14.** Summary of quality control results for actinomycin C in micro-dialysate.

|                  | Nominal actinomycin C concentrations [ng/mL] |                 |                |                 |
|------------------|----------------------------------------------|-----------------|----------------|-----------------|
|                  | LLOQ<br>0.100                                | Low QC<br>0.300 | Mid QC<br>6.00 | High QC<br>75.0 |
| Mean [ng/mL]     | 0.083                                        | 0.313           | 6.67           | 80.1            |
| Accuracy [%]     | 83.2                                         | 104.3           | 111.2          | 106.8           |
| Precision [% CV] | 3.65                                         | 5.78            | 4.95           | 11.09           |

N = 5 replicates at each LLOQ and QC level. CV: coefficient of variation; LLOQ: lower limit of quantification; QC: quality control.

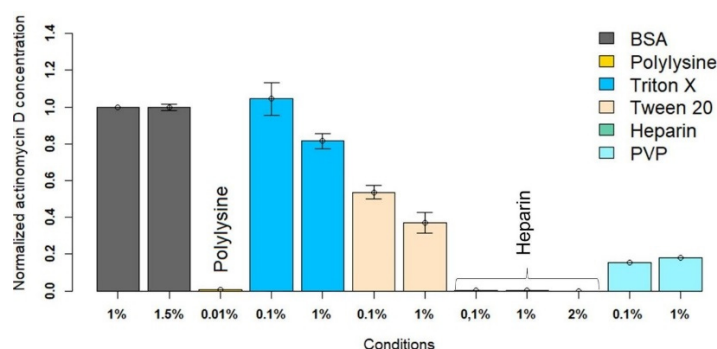

**Figure S2.** Coating strategies to avoid non-specific binding of actinomycin D in case of BSA and Tritonx100. Microdialysis tubes were coated for 1 h with indicated chemicals and drug concentrations normalized to the nominal value. Data is expressed as mean  $\pm$  standard deviation. Coatings were not stable for the whole duration of microdialysis procedure (data not shown).

## References

1. Mondick, J.T.; Gibiansky, L.; Gastonguay, M.R.; Skolnik, J.M.; Cole, M.; Veal, G.J.; Boddy, A.V.; Adamson, P.C.; Barrett, J.S. Population pharmacokinetic investigation of actinomycin-D in children and young adults. *The Journal of Clinical Pharmacology* **2008**, *48*, 35–42.
2. Hill, C.R.; Cole, M.; Errington, J.; Malik, G.; Boddy, A.V.; Veal, G.J. Characterisation of the clinical pharmacokinetics of actinomycin D and the influence of ABCB1 pharmacogenetic variation on actinomycin D disposition in children with cancer. *Clinical pharmacokinetics* **2014**, *53*, 741–751.
3. Boxenbaum, H. Interspecies pharmacokinetic scaling and the evolutionary- comparative paradigm. *1984*, *15*, 1071–1121.
